# Supplementary material for: Impact of sampling frequency on low-cost PM sensor performance including short-term temporal events in high PM environments
Source: Copernicus journal article supplement (doi:10.5194/ar-3-429-2025), 2025-07-11
Supplement: Supplementary file 1 [file ar-3-429-2025-supplement.pdf]

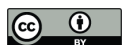

*Supplement of*

## **Impact of sampling frequency on low-cost PM sensor performance including short-term temporal events in high PM environments**

**Gulshan Kumar et al.**

*Correspondence to:* Jay Dhariwal ([jay@design.iitd.ac.in](mailto:jay@design.iitd.ac.in))

The copyright of individual parts of the supplement might differ from the article licence.

|                                                | Minimum | Maximum | Mean  | 25th percentile | 50th percentile | 75th percentile |
|------------------------------------------------|---------|---------|-------|-----------------|-----------------|-----------------|
| PM <sub>2.5</sub> ( $\mu\text{g}/\text{m}^3$ ) | 11.7    | 303.3   | 84.41 | 49.3            | 73.4            | 110.5           |
| Temperature ( $^{\circ}\text{C}$ )             | 16.3    | 36.6    | 25.50 | 20.9            | 24.9            | 30.1            |
| Humidity (%)                                   | 27      | 93      | 65.39 | 46              | 72              | 82              |

**Supplementary Table S1.** Summary table showing descriptive statistics (mean, minimum, maximum, and percentile) for PM<sub>2.5</sub> levels, ambient temperature, and relative humidity during the study period.

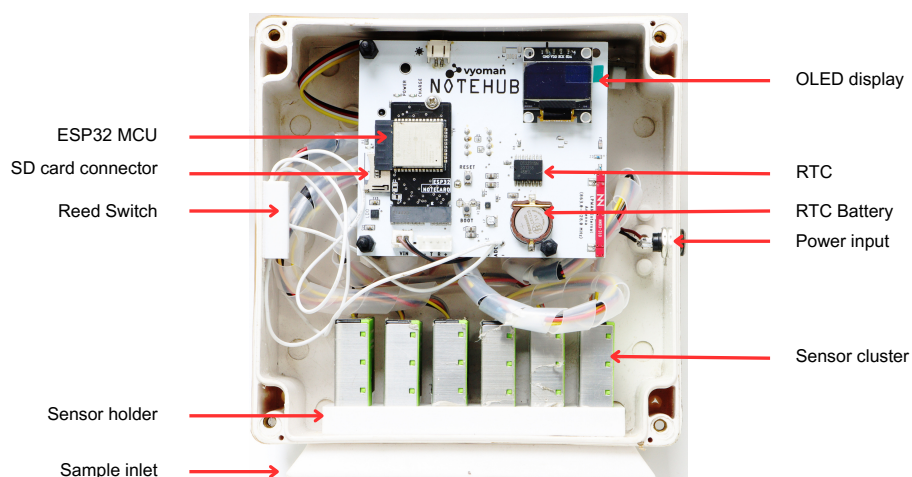

**Supplementary Figure S1.** Custom designed SPS30 sensor hub.

## Data Availability

The data set recorded as part of this study has been made available at this link: <https://zenodo.org/records/14230696>.
